# Supplementary material for: Outcomes of a Caregiver-Focused Short Message Service (SMS) Intervention to Reduce Intake of Sugar-Sweetened Beverages in Rural Caregivers and Adolescents
Source: MDPI journal article supplement (doi:10.3390/nu15081957), 2023-04-19
Supplement: s1 [file s1]

---

*Supplementary Materials*

# **Enrollment, Retention, Engagement, and Behavioral Outcomes of a Caregiver-Focused Short Message Service (SMS) Intervention to Reduce Intake of Sugar-Sweetened Beverages in Rural Caregivers and Adolescents**

Donna-Jean P Brock <sup>1,\*</sup>, Maryam Yuhas <sup>2</sup>, Kathleen J Porter <sup>1</sup>, Phillip Chow <sup>3</sup>, Lee Ritterband <sup>3</sup>, Deborah Tate <sup>4</sup> and Jamie M Zoellner <sup>1</sup>

Table S1. Sample SMS messages.

| SAMPLE ASSESSMENT                                                                                                                                                                       |                                                                                                                     |                                                                                                                                                                                                                                                                                                                                                                                                                                                               |                                                                                                                                                                                                                                                                                                                                                                                                                                                     |                                                                                                                                                 |
|-----------------------------------------------------------------------------------------------------------------------------------------------------------------------------------------|---------------------------------------------------------------------------------------------------------------------|---------------------------------------------------------------------------------------------------------------------------------------------------------------------------------------------------------------------------------------------------------------------------------------------------------------------------------------------------------------------------------------------------------------------------------------------------------------|-----------------------------------------------------------------------------------------------------------------------------------------------------------------------------------------------------------------------------------------------------------------------------------------------------------------------------------------------------------------------------------------------------------------------------------------------------|-------------------------------------------------------------------------------------------------------------------------------------------------|
| Caregiver SSB Intake                                                                                                                                                                    | Child SSB Intake                                                                                                    | Sample SSB Scenarios <sup>1</sup>                                                                                                                                                                                                                                                                                                                                                                                                                             | Sample Feedback                                                                                                                                                                                                                                                                                                                                                                                                                                     | Strategy Selections                                                                                                                             |
| Hi it's KidsSIPSmarter and it's time to do a quick check in! Please answer the next 3 questions. How often did YOU, [CAREGIVER NAME], drink sugary drinks last week? Reply with NUMBER. | How often did [CHILD'S NAME] drink sugary drinks last week? Reply with NUMBER.                                      | 1. Caregiver and child non-consumers<br>2. Caregiver non-consumer and child reduced<br>3. Caregiver non-consuming and child maintained<br>4. Caregiver non-consumer and child increased<br>5. Caregiver reduced child non-consumer<br>6. Caregiver and child reduced<br>7. Caregiver reduced and child maintained<br>8. Caregiver reduced and child increased<br>9. Caregiver maintained and child non-consumer<br>10. Caregiver maintained and child reduced | 1. Caregiver increased and child reduced:<br>[CHILD'S NAME] has decreased his/her intake since last time, but it seems you have increased your intake from last time. Work together as a family to develop a plan, you can always get back on track!<br><br>2. Caregiver and child non-consumer:<br>Congrats! Both you and [CHILD'S NAME] drank little to no sugary drinks last week. A healthy family is a happy family, keep up the awesome work! | 1. Family/Friends tips<br>2. Breaking your habit<br>3. Home/Shopping tips<br>4. Parenting around sugary drinks<br>5. Finding tasty alternatives |
| SAMPLE Educational Messages                                                                                                                                                             |                                                                                                                     |                                                                                                                                                                                                                                                                                                                                                                                                                                                               |                                                                                                                                                                                                                                                                                                                                                                                                                                                     |                                                                                                                                                 |
| Lesson 2                                                                                                                                                                                | Lesson 5                                                                                                            | Lesson 7                                                                                                                                                                                                                                                                                                                                                                                                                                                      | Lesson 8                                                                                                                                                                                                                                                                                                                                                                                                                                            | Lesson 10                                                                                                                                       |
| Drink less, live more, throw sugar out the door! Limit sugary drinks to 8oz for adults and 0 for kids to improve health for the whole fam.                                              | Sugary drink companies are good at using ads to convince us to buy their stuff. Don't let these companies fool you! | [CHILD'S NAME] knows why and how to drink fewer sugary drinks. Encourage them to become a leader to help others drink less.                                                                                                                                                                                                                                                                                                                                   | [CHILD'S NAME] created a public service announcement about drinking fewer sugary drinks. Ask how s/he likes being a leader for a healthier community.                                                                                                                                                                                                                                                                                               | Drink less, brush more! Any amount of sugary drinks can cause tooth decay but sipping through the day is worse than drinking it all at once.    |
| SAMPLE Strategy Messages <sup>2</sup>                                                                                                                                                   |                                                                                                                     |                                                                                                                                                                                                                                                                                                                                                                                                                                                               |                                                                                                                                                                                                                                                                                                                                                                                                                                                     |                                                                                                                                                 |
| Family/Friends tips                                                                                                                                                                     | Breaking your habit                                                                                                 | Home/Shopping Tips                                                                                                                                                                                                                                                                                                                                                                                                                                            | Parenting around sugary drinks                                                                                                                                                                                                                                                                                                                                                                                                                      | Finding tasty alternatives                                                                                                                      |
| Going to a party soon? Plan ahead. Bring your own non-sugary drinks, and share them with your friends.                                                                                  | Wondering where to start breaking your habit? Try keeping a log of when and where you drink sugary drinks.          | Next grocery shopping trip, buy half the amount of sugary drinks you normally buy. If drinks finish, that's it till the next trip.                                                                                                                                                                                                                                                                                                                            | Talk to [your child] about reducing sugary drinks and decide on limits together. Make reducing                                                                                                                                                                                                                                                                                                                                                      | Try diluting your sugary drink with ice or water. This will help you reduce your sugary drink                                                   |

---

sugary drinks a competition & intake AND let you get the taste  
have fun with it you crave.

---

<sup>1</sup> There are up to 16 possible SSB intake scenarios that combine reducing, maintaining, increasing and not consuming SSBs that have specific SMS messages programmed as feedback to caregivers.

<sup>2</sup> Non-consuming caregiver-child dyads received positive reinforcement messages rather than strategy messages (e.g., Way to go! You and your family are on the healthy lifestyle track! Keep going!).

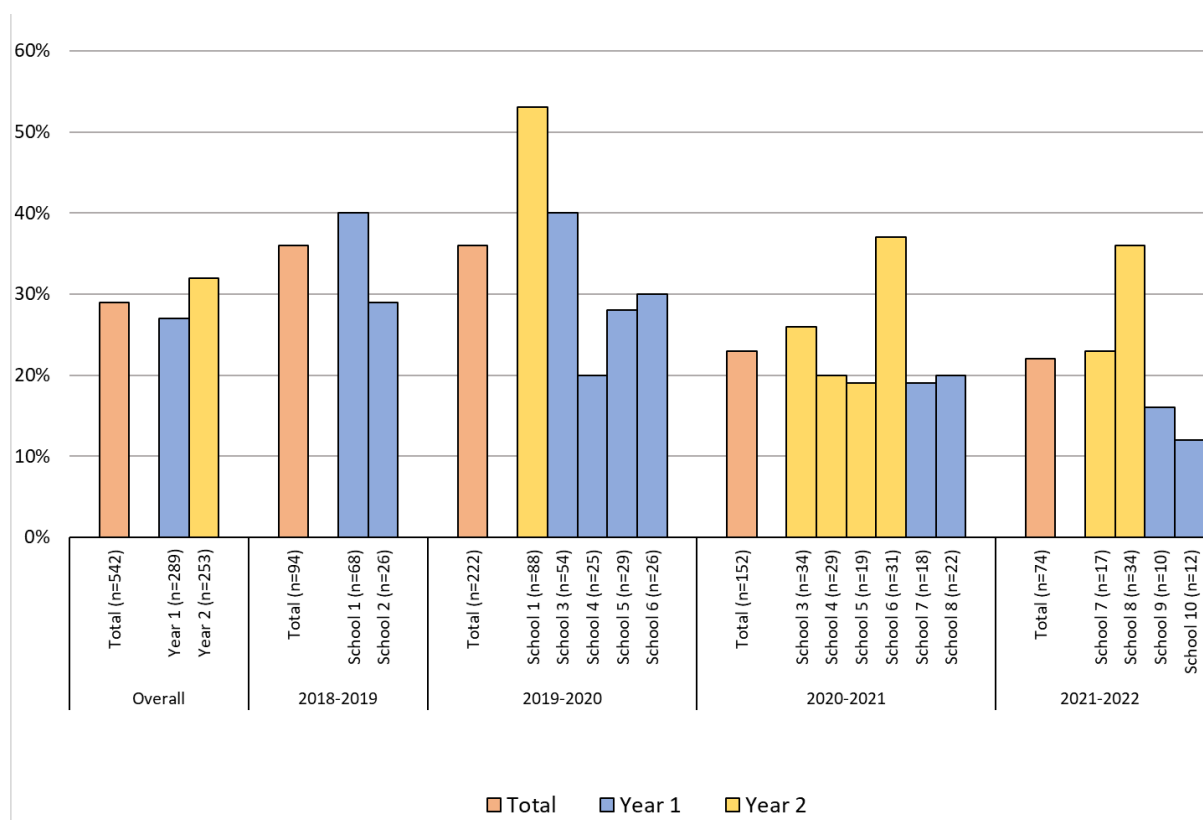

**Figure S1.** Caregiver SMS enrollment rates by school, year, and year of participation in the study (n = 542)<sup>1</sup>. <sup>1</sup>Year of participation in the study refers to year of receipt of the intervention. Some schools were randomized as control schools and received the intervention a year later.

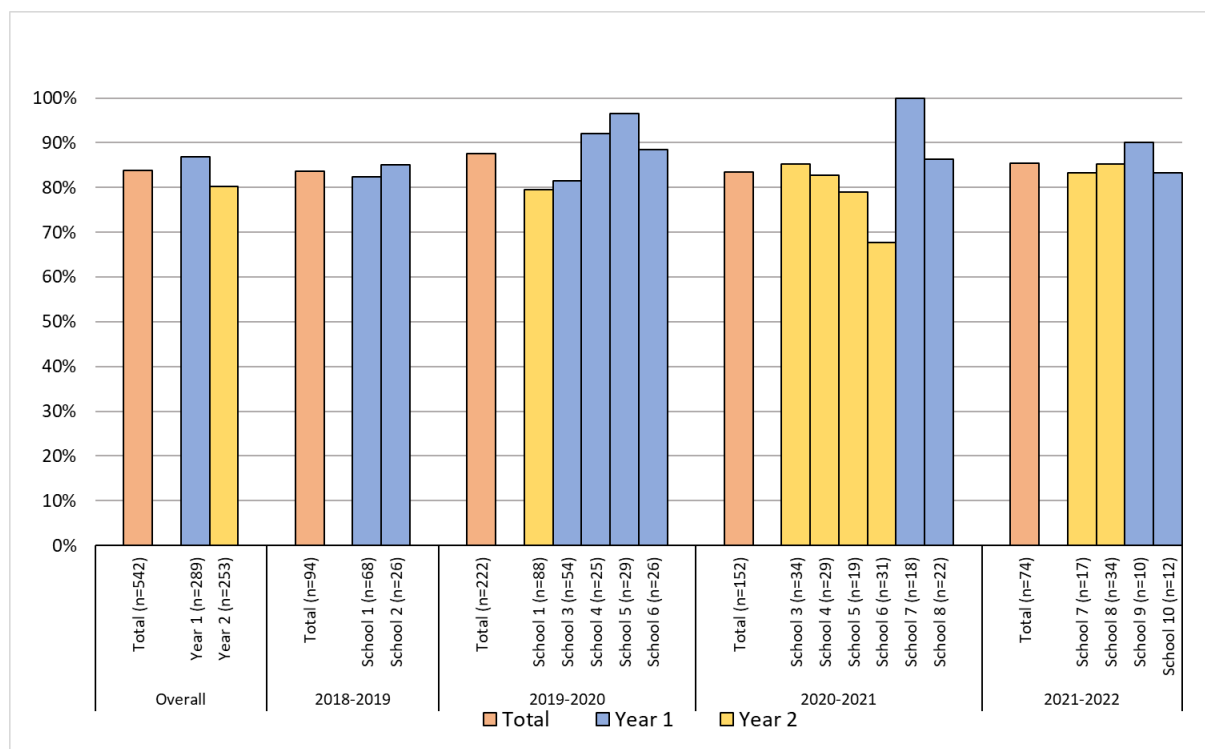

**Figure S2.** Retention rates by school, year, and study phase for enrolled caregivers (n = 542).
